# Supplementary material
Source: publisher figshare collection journal article supplement (https://frontiersin.figshare.com/ndownloader/files/13291397)
Supplement: Supplementary file 1 [file 13291397]

**Table S1.** The depths, dimensions, volumes, and aspect ratios of the Havre 2012 lavas and domes based on the 2015 AUV and 2002 MBES bathymetry data. The volumes are calculated from the bathymetric differences of the two datasets; error margins are given with 95% confidence range (-22.3 ~ +31.5 m). The margins are large for the lavas emplaced on the caldera wall due to the extremely steep topography. The aspect ratios (lateral extent:thickness) were calculated following the method of Walker (1973). Note that the method gives a higher number for a flat lava.

| **Unit** | Vent depth [m bsl] | Depth of top [m bsl] | Depth of deepest part [m bsl] | Median thickness [m] | Length [m] | Volume (95% confidence range) [106m3] | Aspect ratio |
| --- | --- | --- | --- | --- | --- | --- | --- |
| **A** | N/A | 1170 | 1530 | 37.1 | 1020 | 8.2 (3.6-45.2) | 16.0 |
| **B** | 1240 | 1170 | 1520 | 33.3 | 630 | 2.3 (1.1-18) | 10.3 |
| **C** | 1260 | 1140 | 1530 | 48.5 | 1350 | 33.4 (20.6-115.5) | 47.7 |
| **D** | N/A | 1150 | N/A | 86.1 | <50 | 0.3 (0.2-0.6) |  |
| **E** | 1270 | 1170 | 1520 | 99.9 | 540 | 6.8 (5.2-19.4) | 8.8 |
| **F** | 1060 | 940 | 1520 | 84 | 1070 | 27.6 (20.2-77.6) | 5.5 |
| **G** | 980 | 930 | 980 | 19.8 | 200 | 0.5 (0.1-3.1) | 3.6 |
| **H** | 970 | 860 | 1000 | 61.6 | 230 | 5.8 (3.9-15.1) | 2.5 |
| **I** | 960 | 850 | 960 | 49.1 | 260 | 4.7 (2.8-15.4) | 3.3 |
| **K** | 990 | 910 | 1040 | 50 | 160 | 2.3 (1.3-6.7) | 2.8 |
| **L** | N/A | 990 | N/A | N/A | <15 | N/A |  |
| **M** | 1010 | 930 | 1020 | 54.5 | 110 | 1.1 (0.6-2.9) | 2.0 |
| **N** | 1035 | 940 | 1040 | 51.6 | 180 | 2.9 (1.7-9.9) | 2.8 |
| **OP** | 900 | 650 | 1050 | 124.5 | 720 | 111.5 (92.7-181.6) | 3.8 |
|  |  |  |  |  |  |  |  |


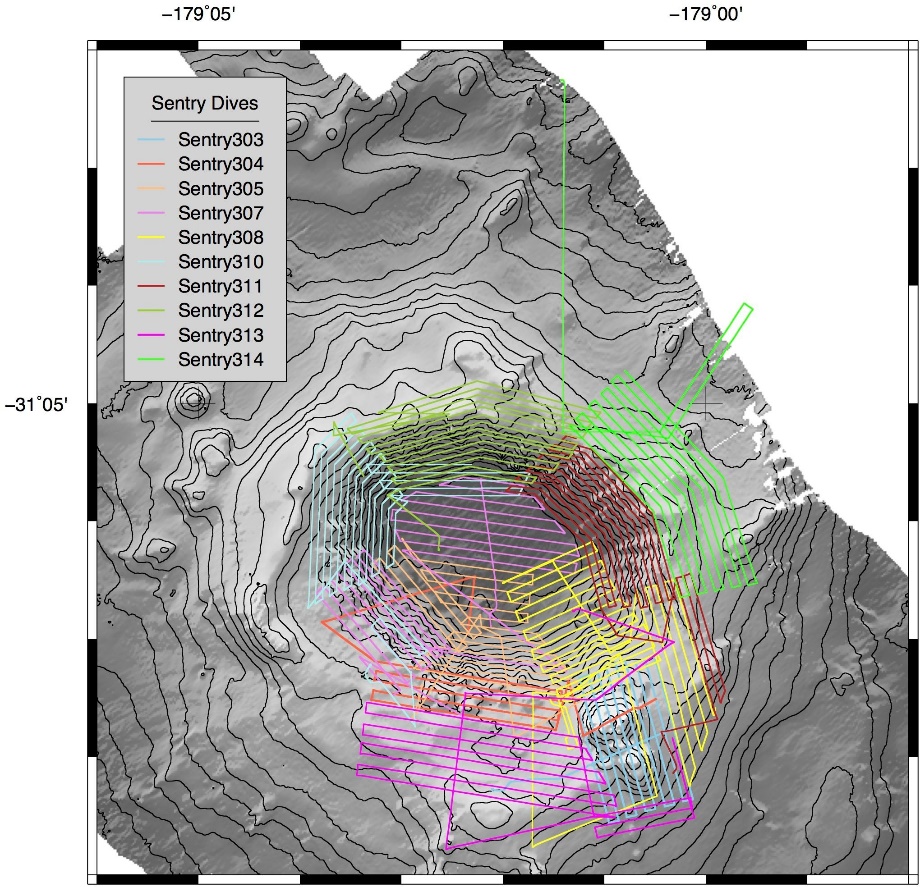


**Figure S1.** Multi-beam bathymetry map (2015) with dive tracks of *Sentry* AUV made during the MESH cruise, after Soule and Carey (2015).


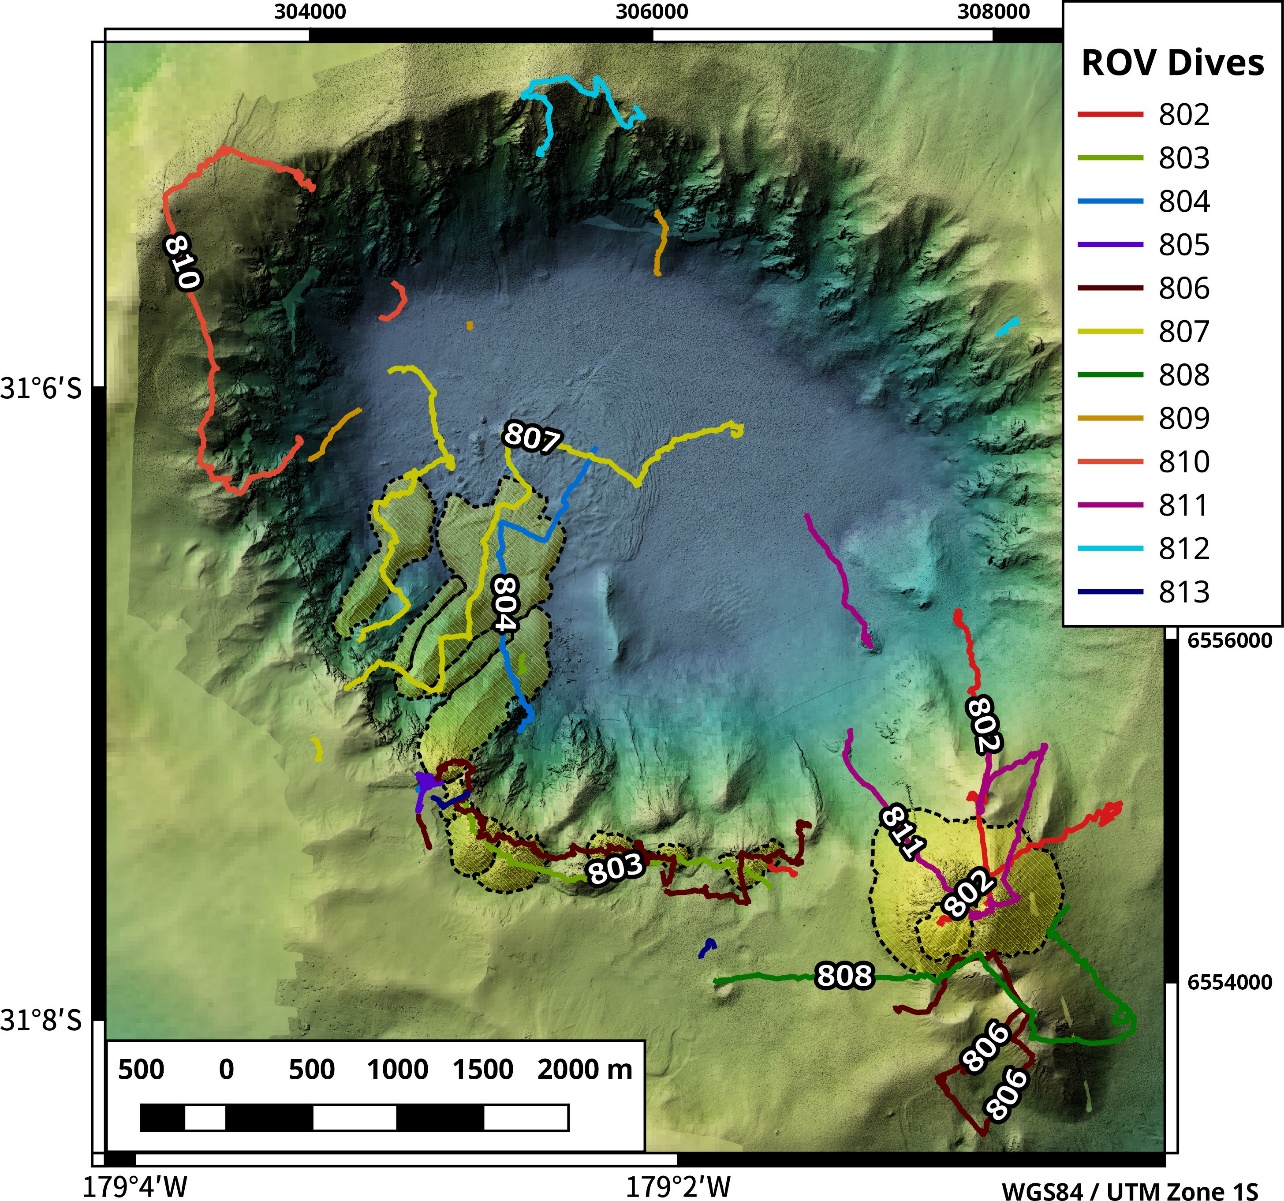


**Figure S2.** AUV bathymetry map (2015) with the dive tracks of *Jason2* ROV during the MESH cruise, after Soule and Carey (2015).


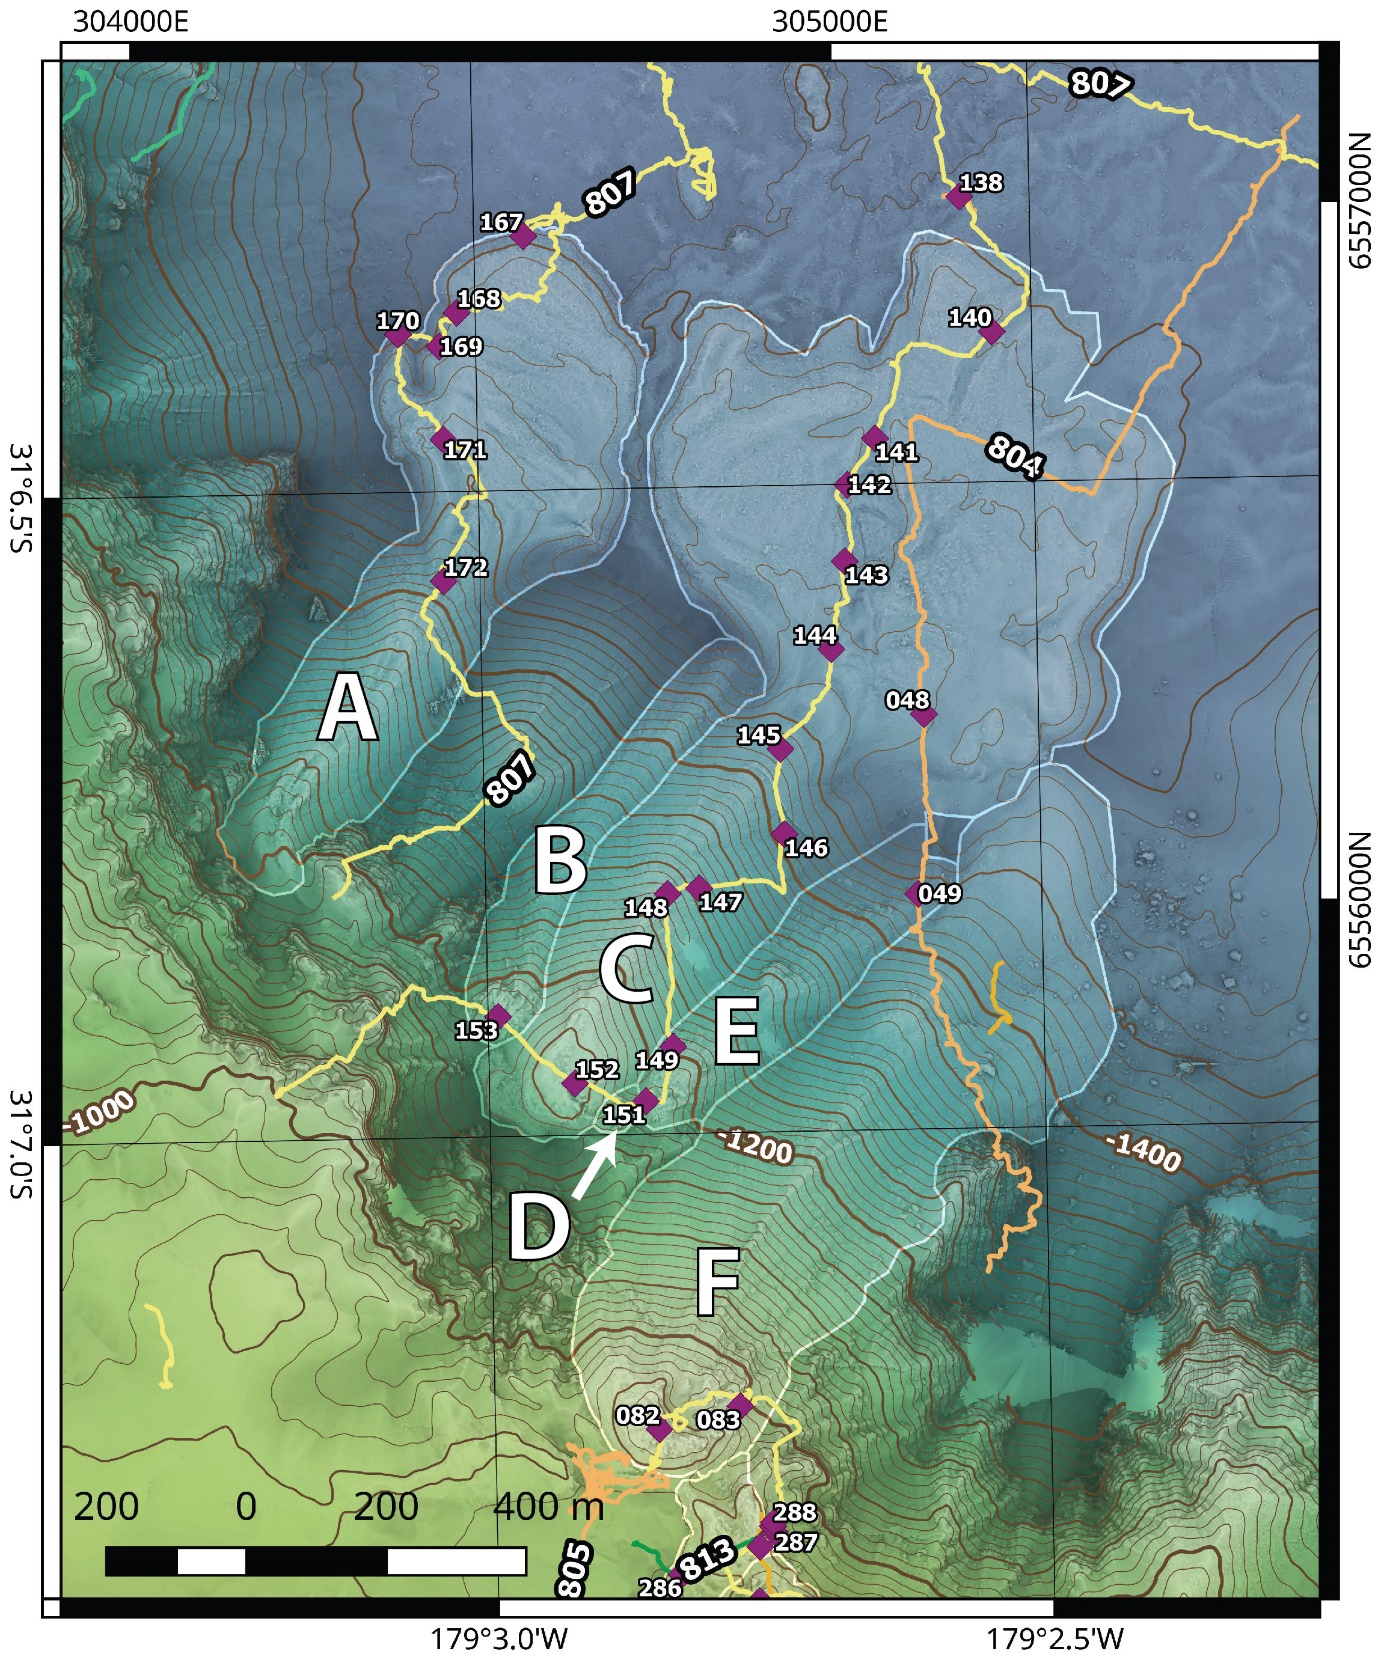


**Figure S3.** Map of lava and dome sample localities (purple diamonds) and tracks of ROV *Jason2* on A to F on the southwestern caldera wall. Contour interval is 20 m.


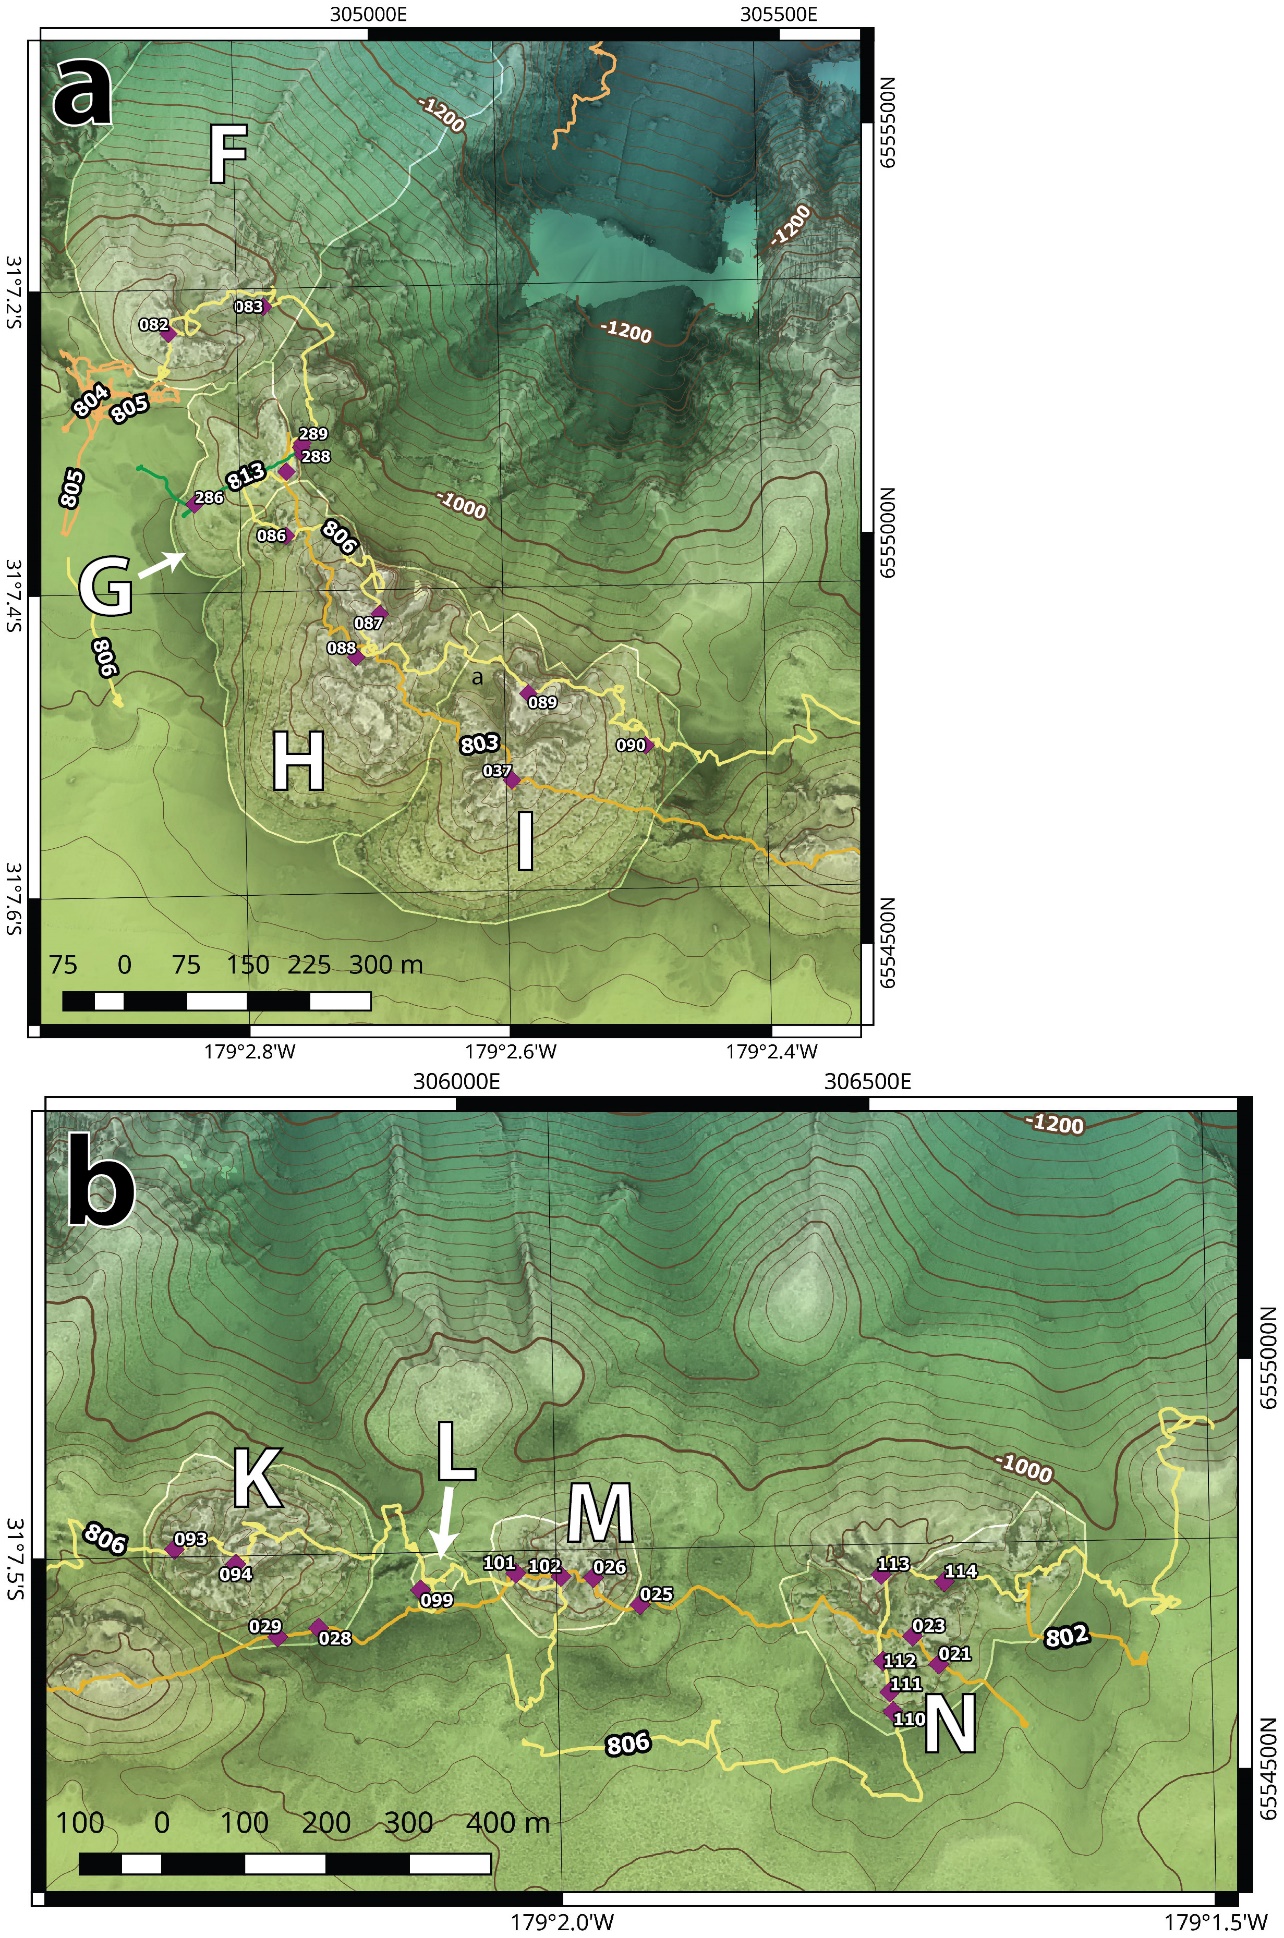


**Figure S4.** (a) Map of lava and dome sample localities (purple diamonds) and tracks of ROV *Jason2* on F, G, H and I on the southwestern caldera rim. (b) Map of dome sample localities (purple diamonds) and tracks of ROV *Jason2* on K, L, M and N on the southern caldera rim. Contour interval is 20 m.

**
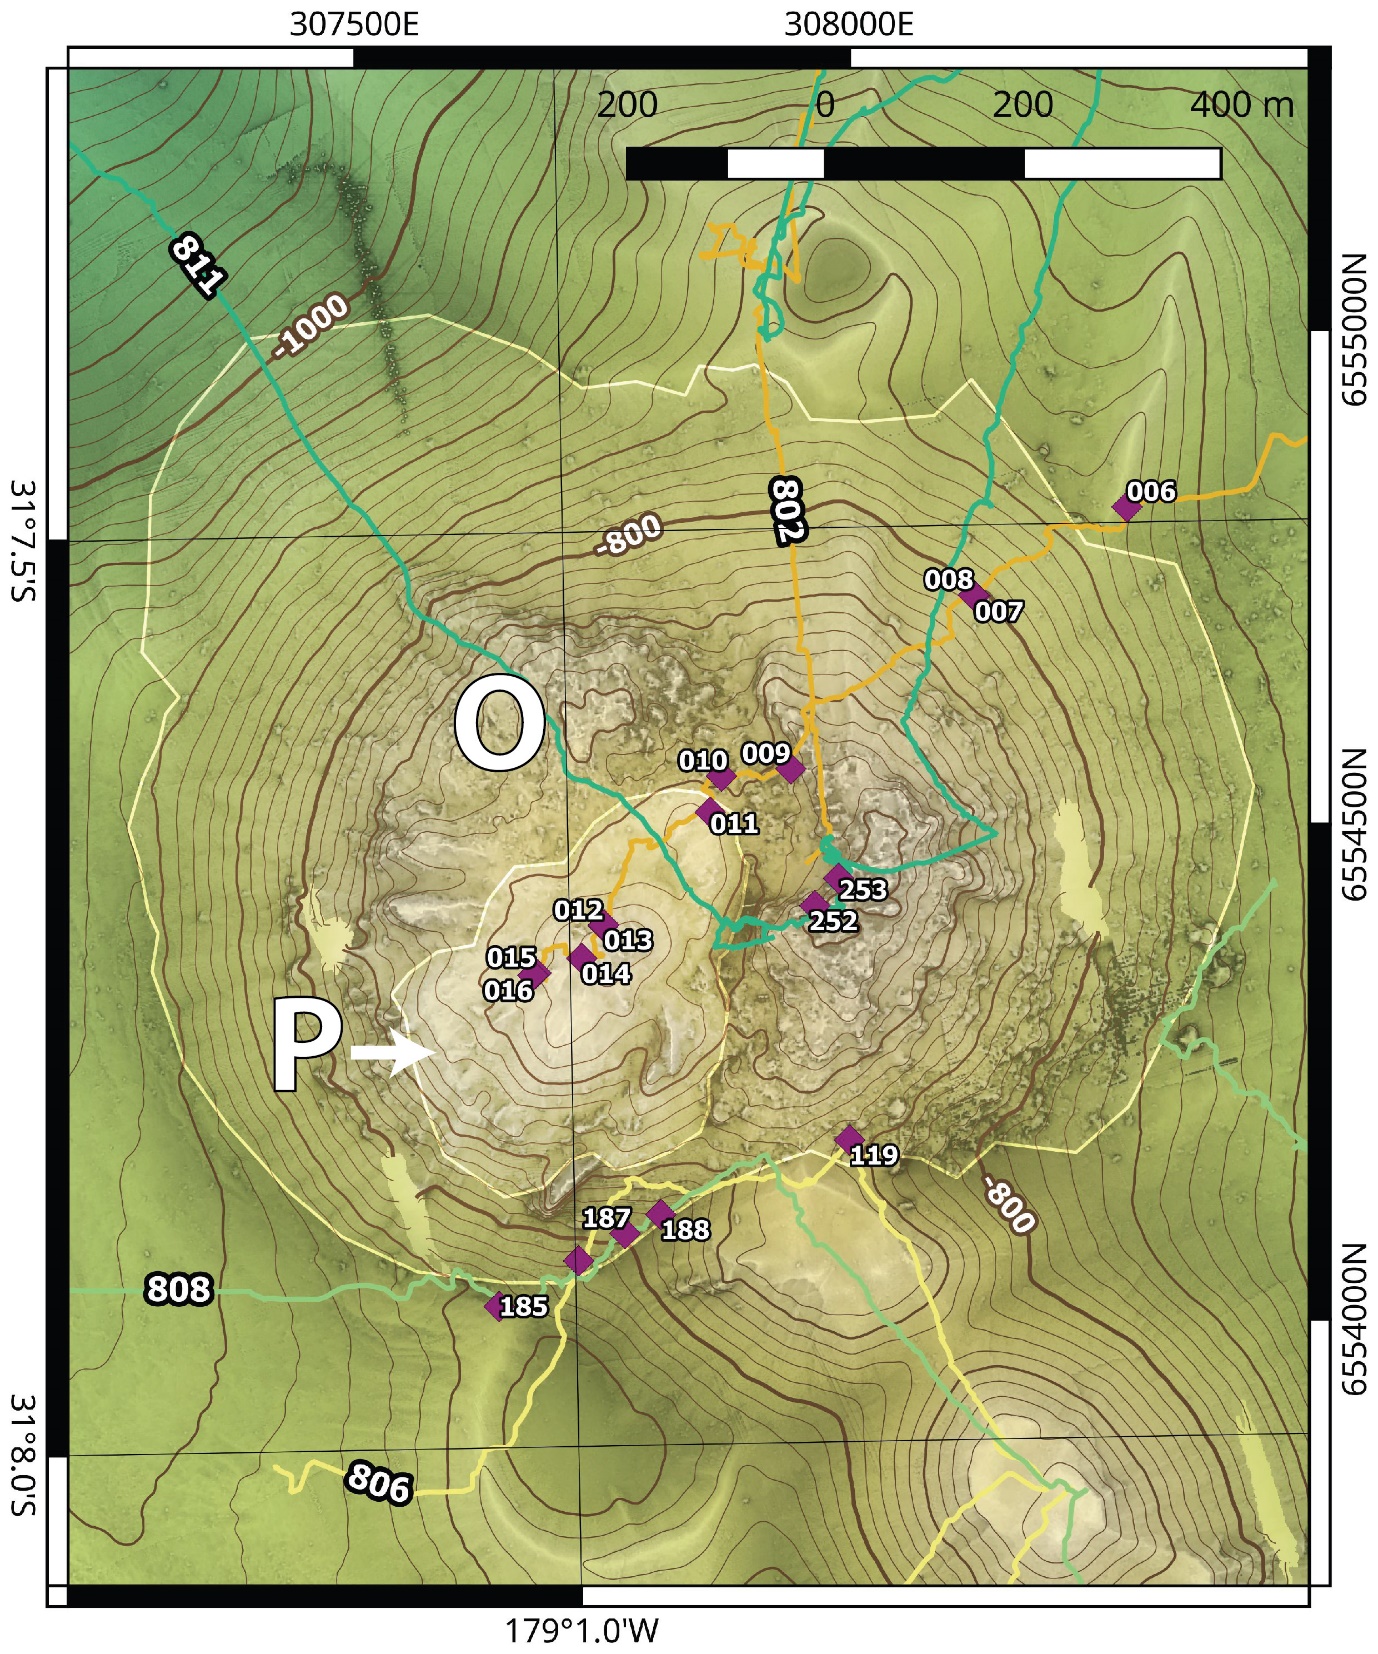
**

**Figure S5.** Map of dome sample localities (purple diamonds) and tracks of ROV *Jason2* on OP on the southern caldera rim. Contour interval is 20 m.


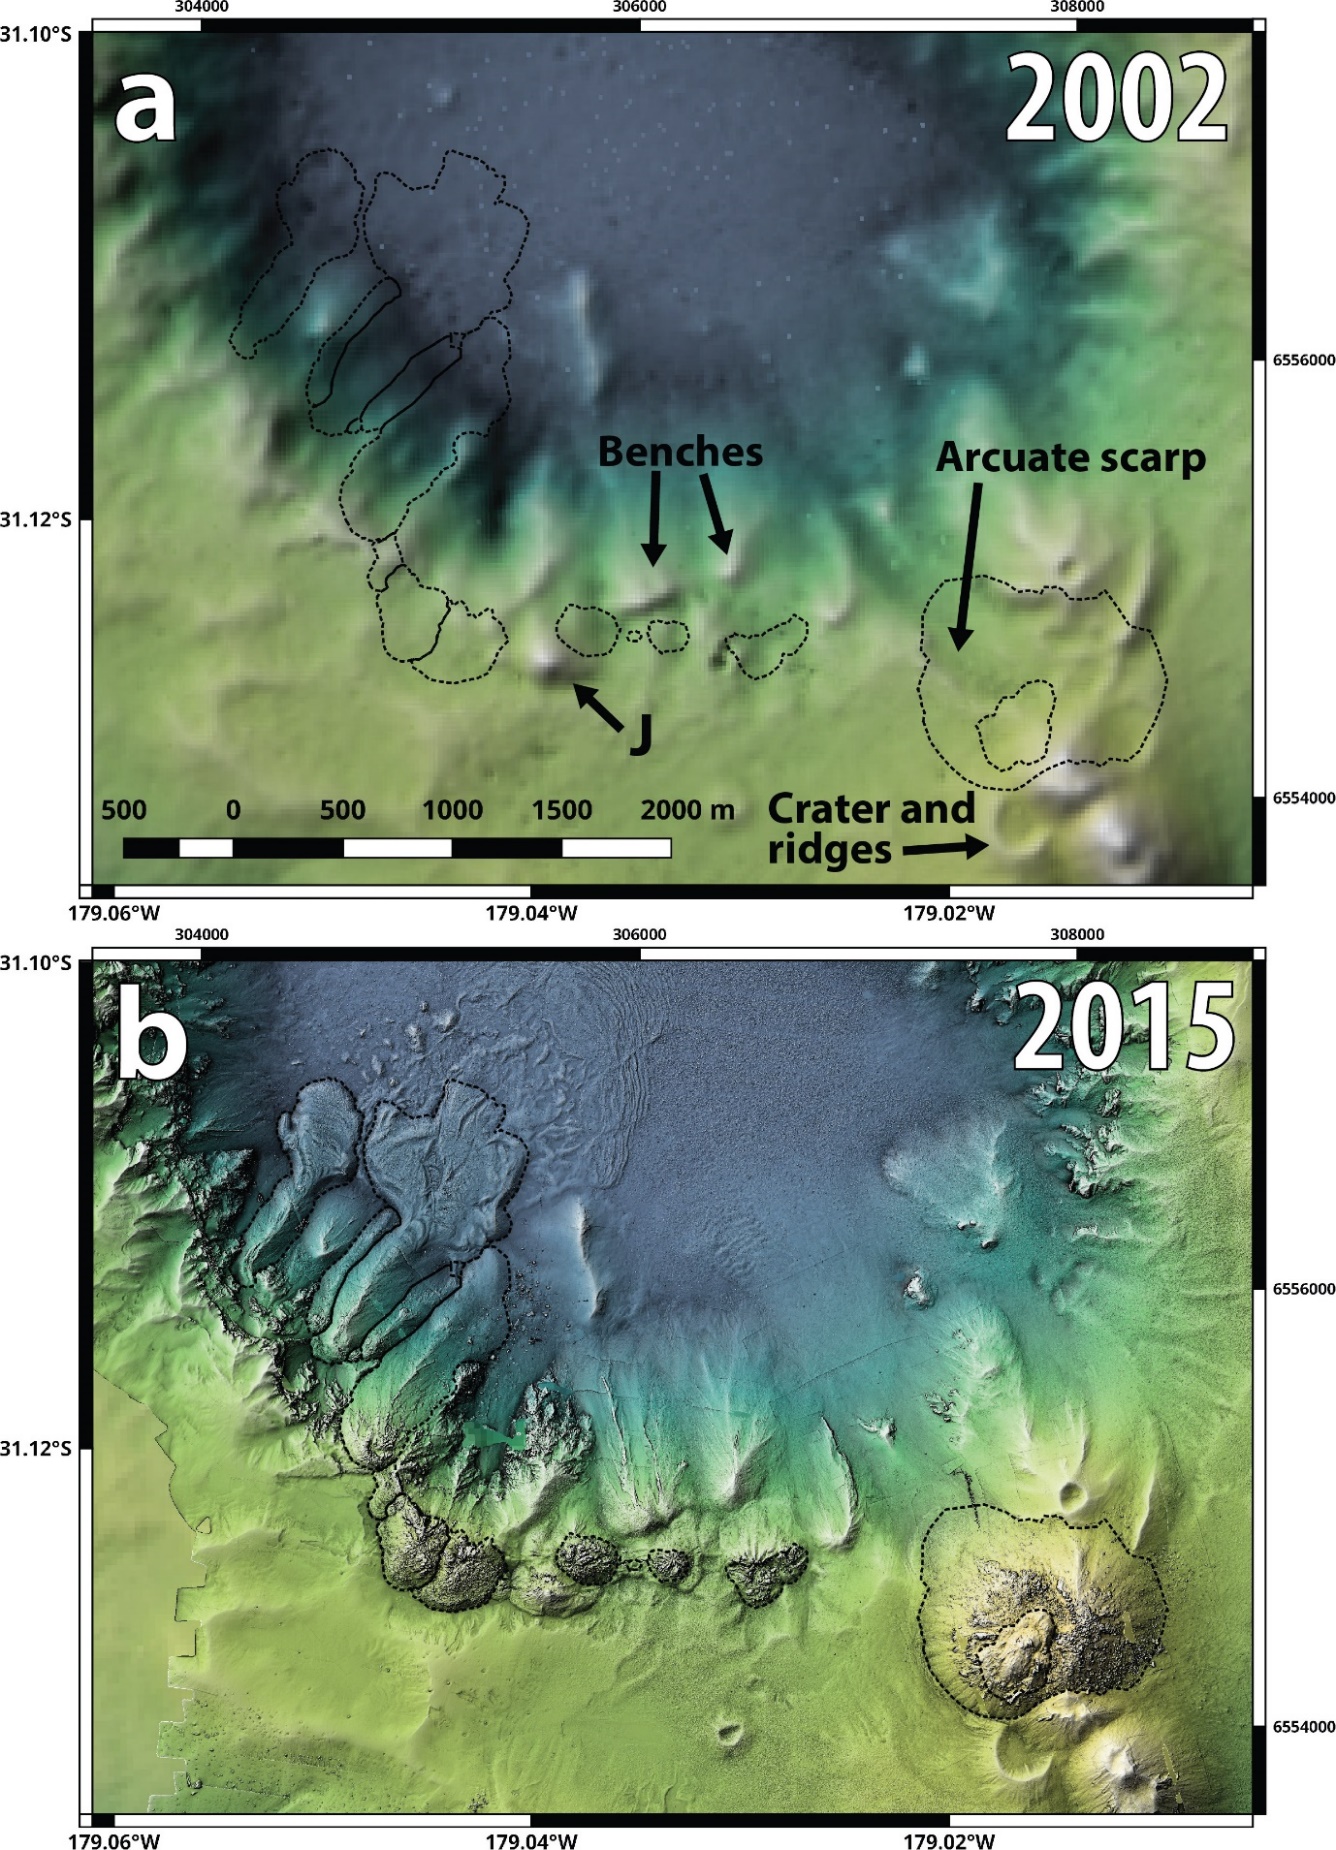


**Figure S6.** (a) Bathymetry map of Havre caldera acquired in 2002 (Wright et al., 2006). The resolution is approximately 21 m. The dotted lines show the extent of lavas and domes erupted in 2012. (b) Bathymetry map of Havre caldera acquired in 2015 (MESH cruise), showing the lavas and domes erupted in 2012 (dotted outline). The resolution is 1 m. White lines show the inferred vent alignments discussed in the text.


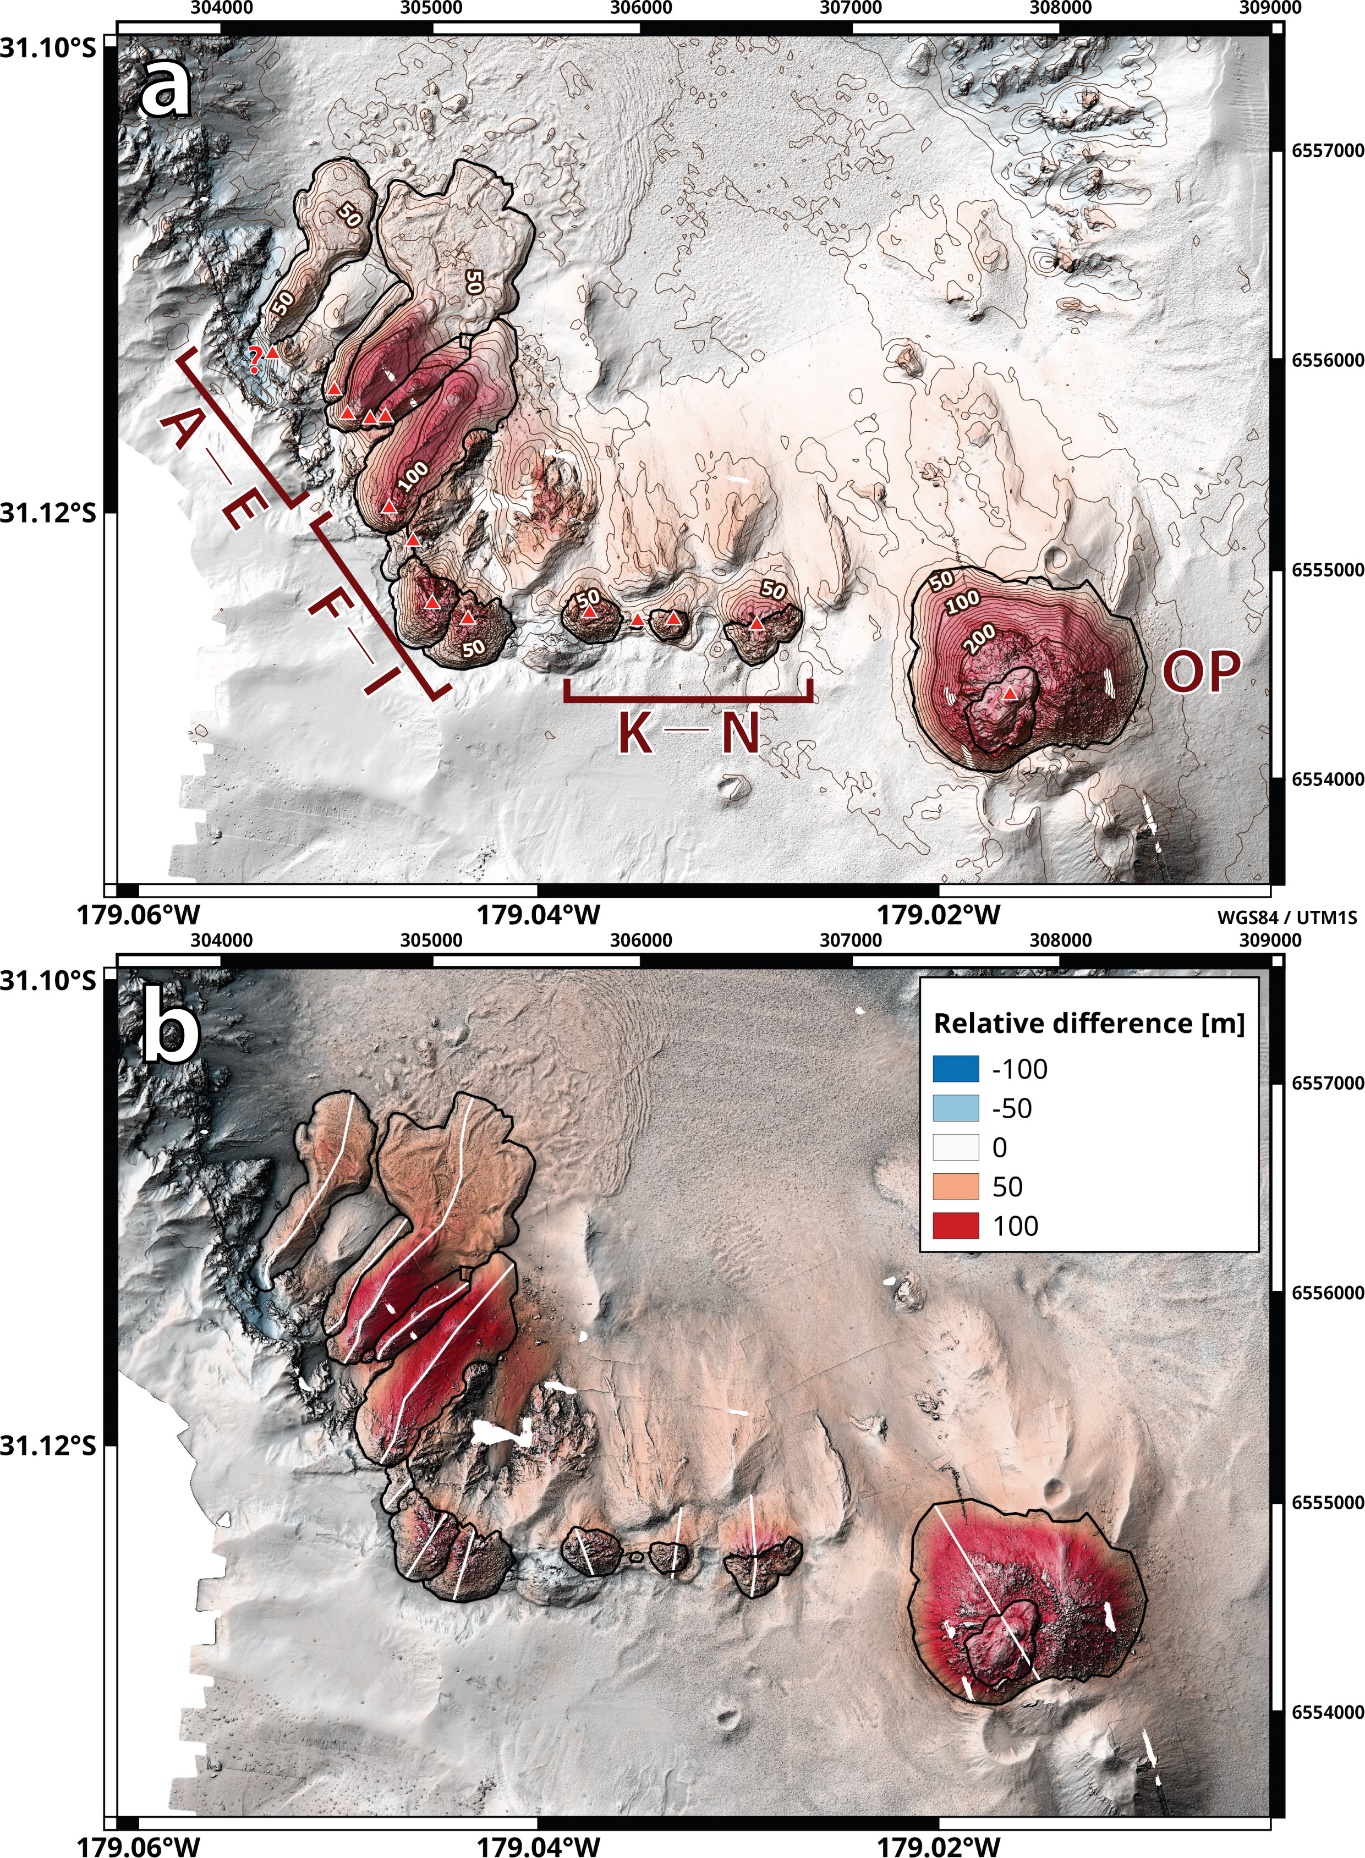


**Figure S7.** Difference between 2002 multi-beam bathymetry data (Wright et al., 2006) and 2015 AUV *Sentry* bathymetry 2015 (this study). (a) Contour map of topographic difference. Contour interval is 10 m. Red triangles indicate the approximate positions of the vents which fed the Havre 2012 lavas and domes. (b) Topographic difference shown by shading overlain on a relief map. The white strokes indicate the positions of cross-sections used in Figure 6 and Figure S8.

**
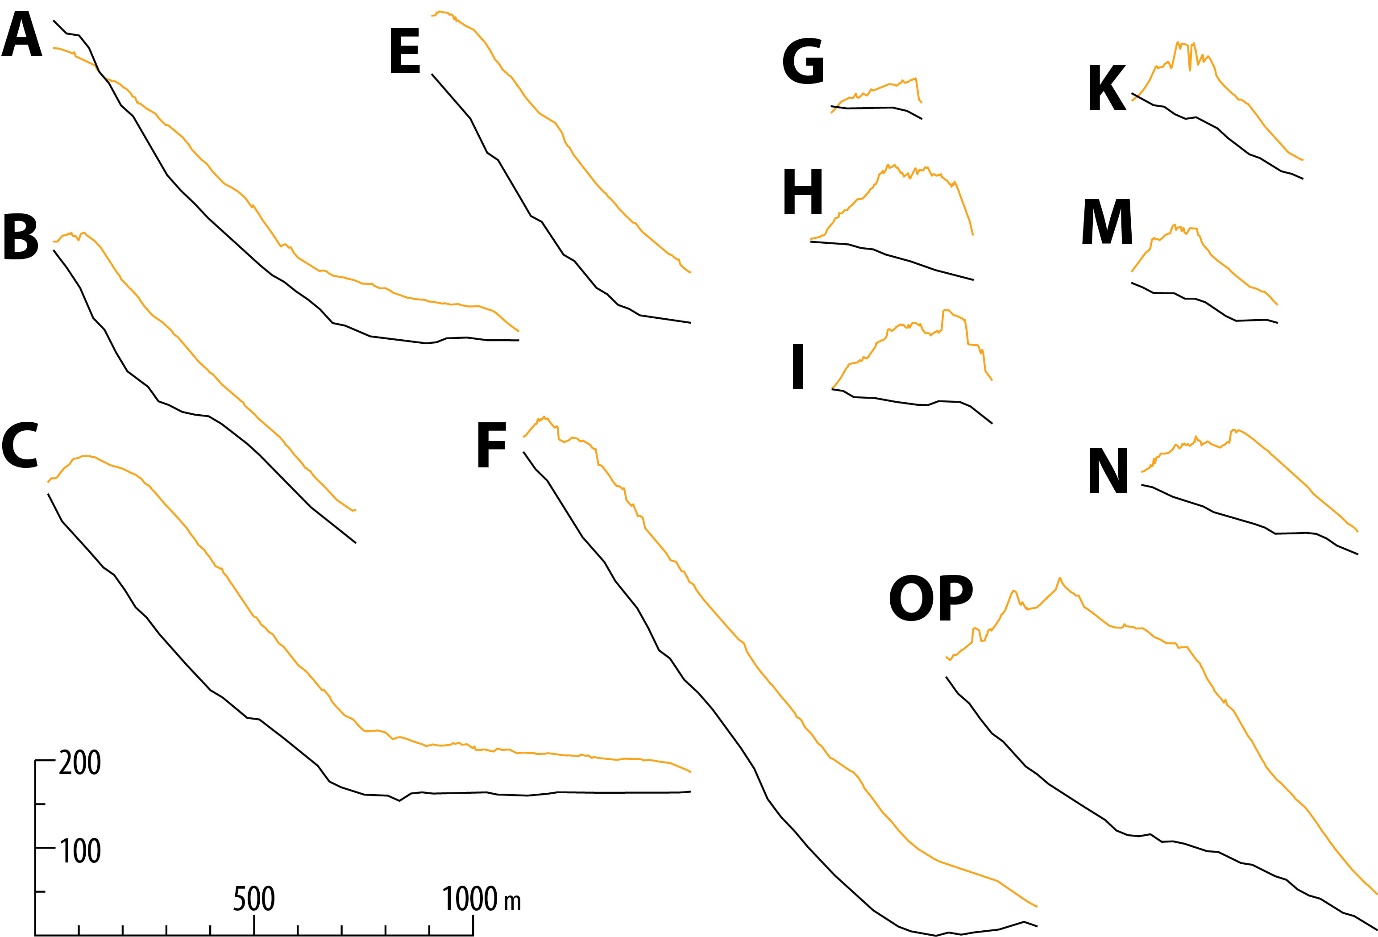
**

**Figure S8.** Comparison between the multi-beam bathymetry data in 2002 (black) and AUV bathymetry data in 2012 (orange) on cross-sections (profile locations given on Figure S7b; no vertical exaggeration). Note that on A there is an area of topographic loss rather than gain between 2002 and 2012.


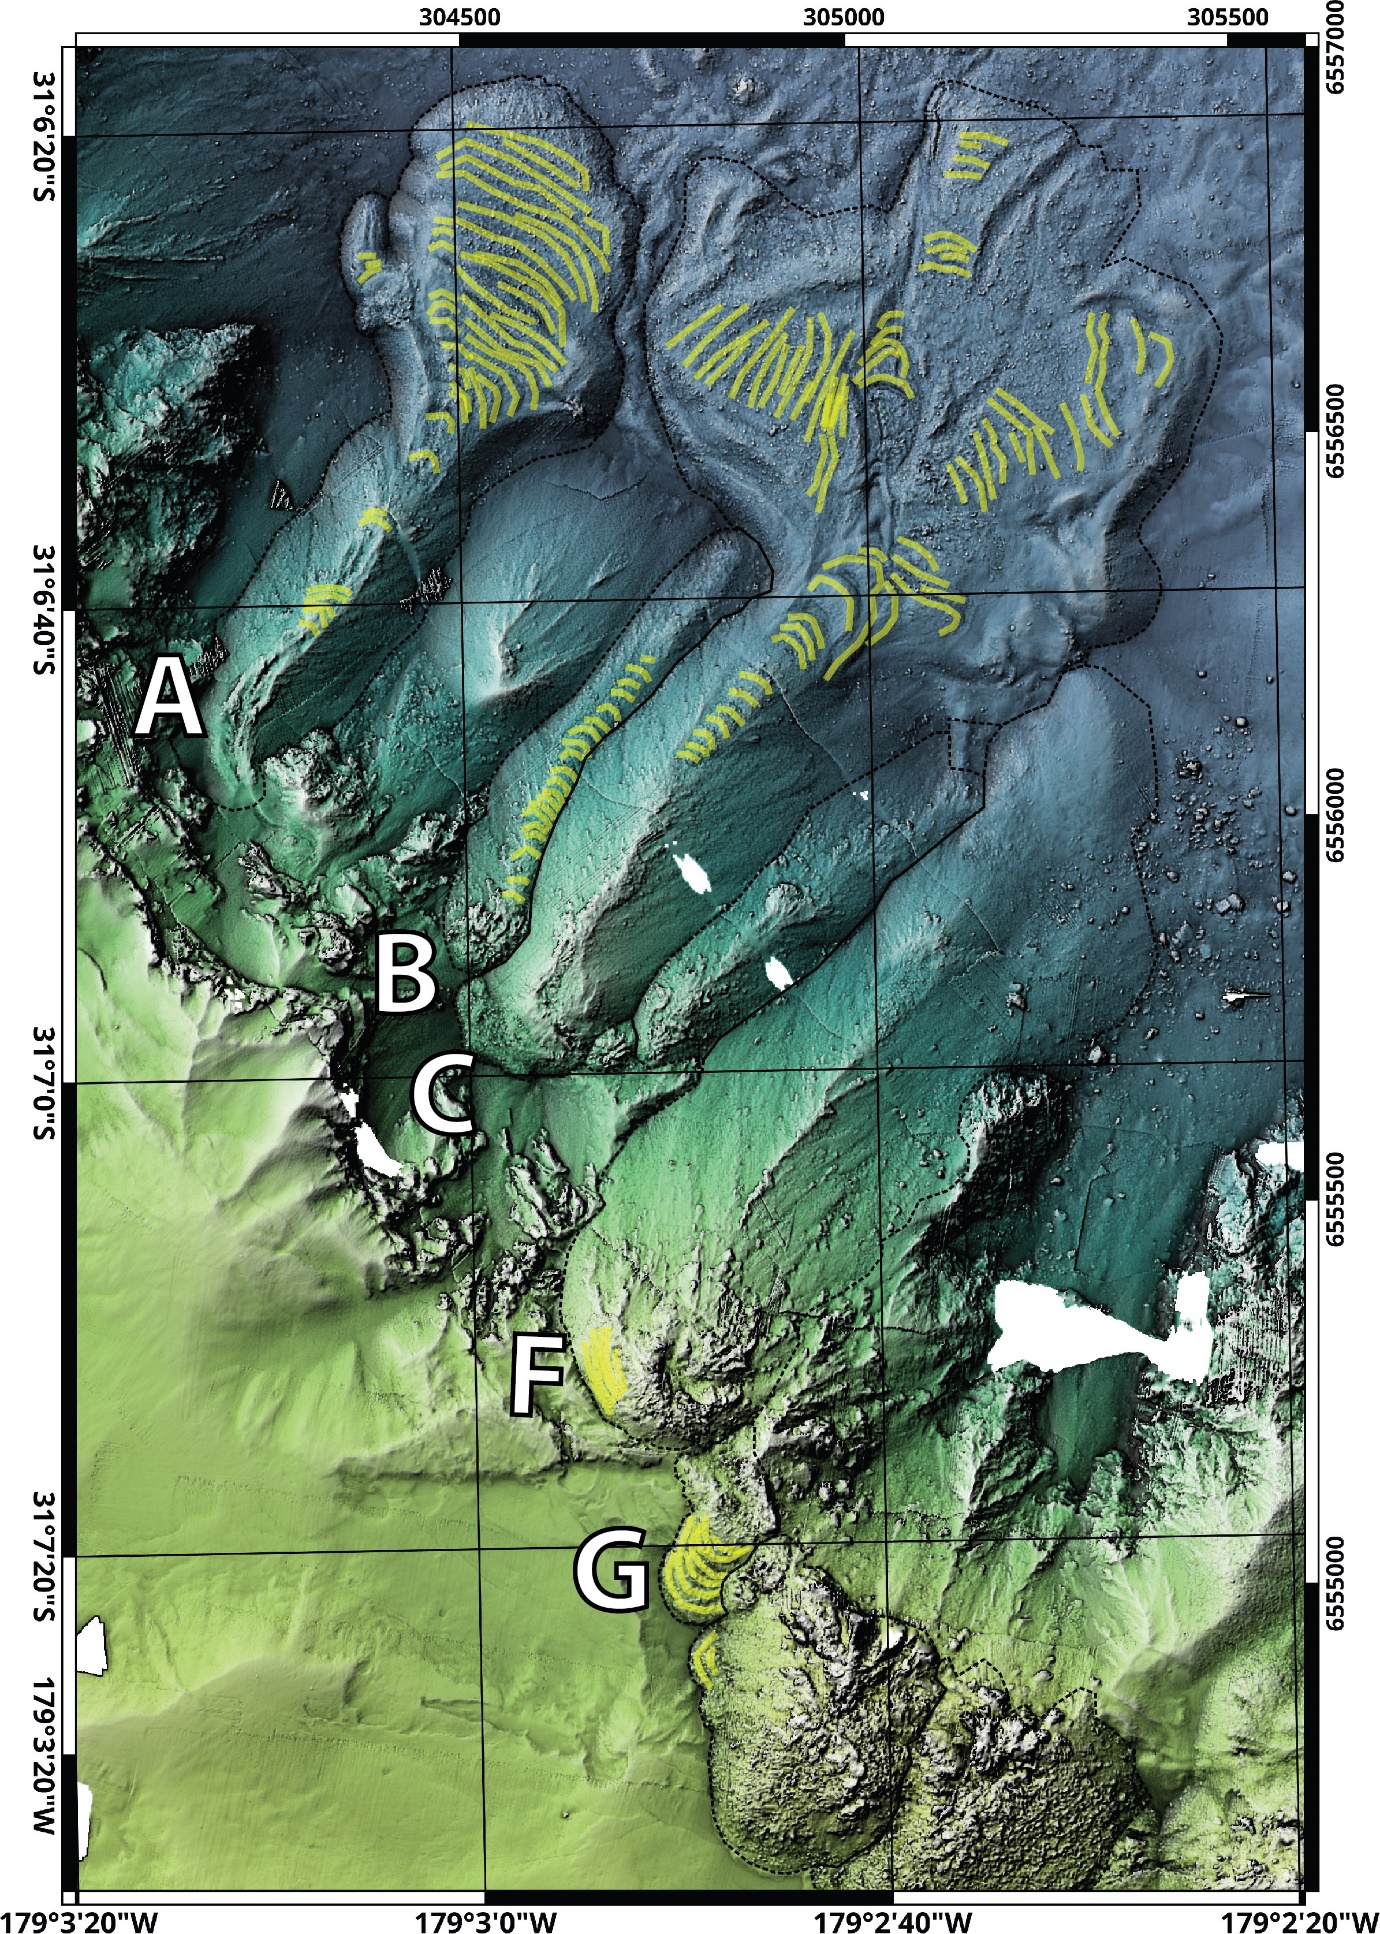


**Figure S9.** Distribution of arcuate surface ridges on Havre 2012 lavas and domes, interpreted from the high-resolution AUV bathymetry map. White patches are places where bathymetric data capture was incomplete.

**
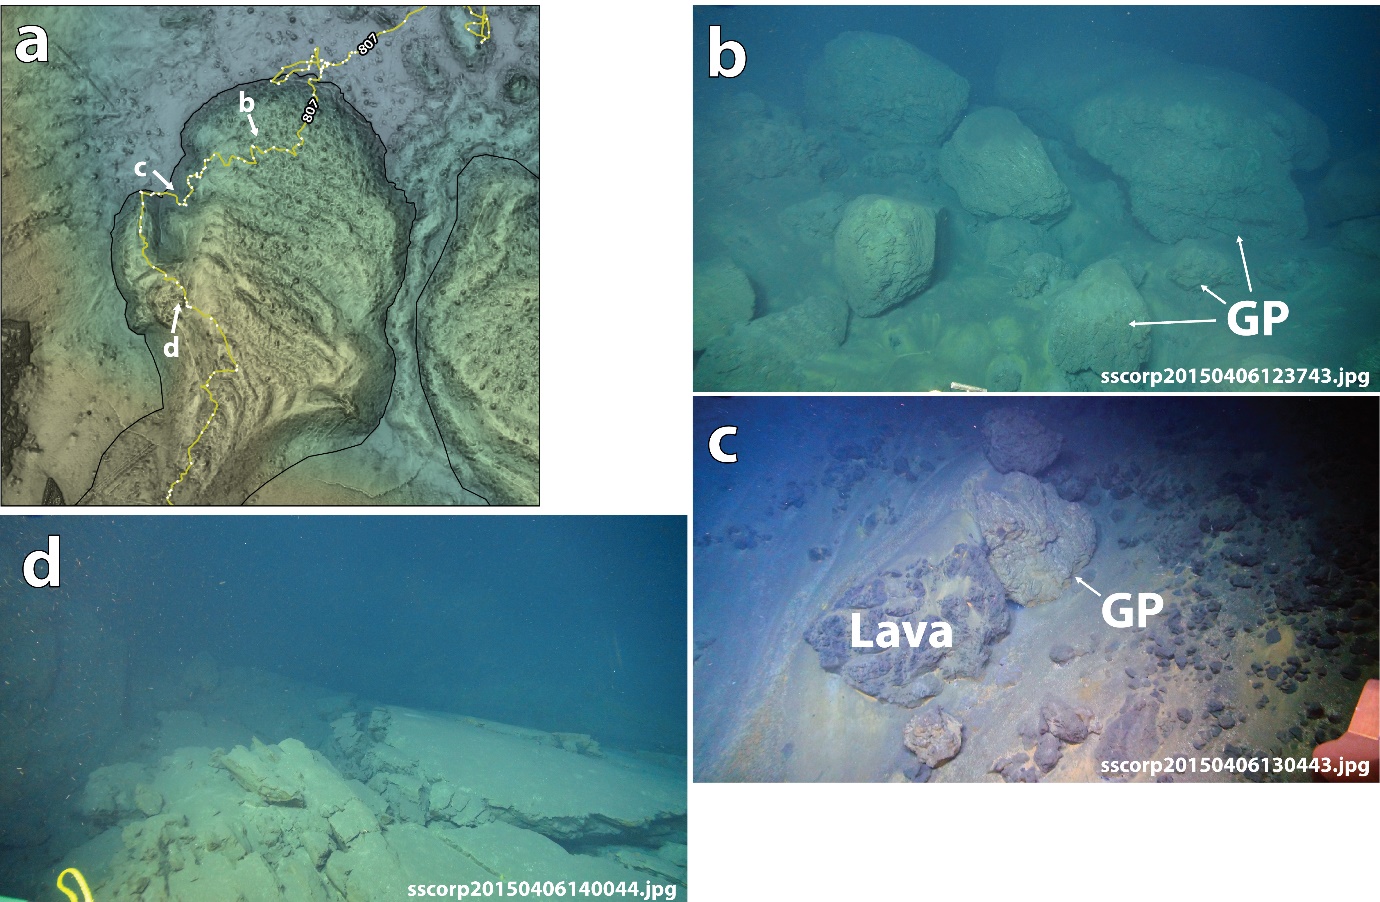
**

**Figure S10.** (a) Enlarged map of A showing the track of ROV observations and the locations of exposures used to determine the timing of emplacement of A with respect to the Giant Pumice deposit. The markers “b”, “c”, “d” give the locations of the outcrops shown in (b) to (d). (b) Giant Pumice clasts resting on the main wide lobe of A at locality “b”, showing that this part of A pre-dates the Giant Pumice. The Giant Pumice clasts and A are both covered by the ash-lapilli deposit. (c) Clasts of Giant Pumice on the main wide lobe of A at locality “c”. (d) Flat surface of A at locality “d”, covered by the ash-lapilli deposit. The Giant Pumice was not sighted here despite the flat topography, suggesting that this small lobe post-dates the Giant Pumice deposit.

**
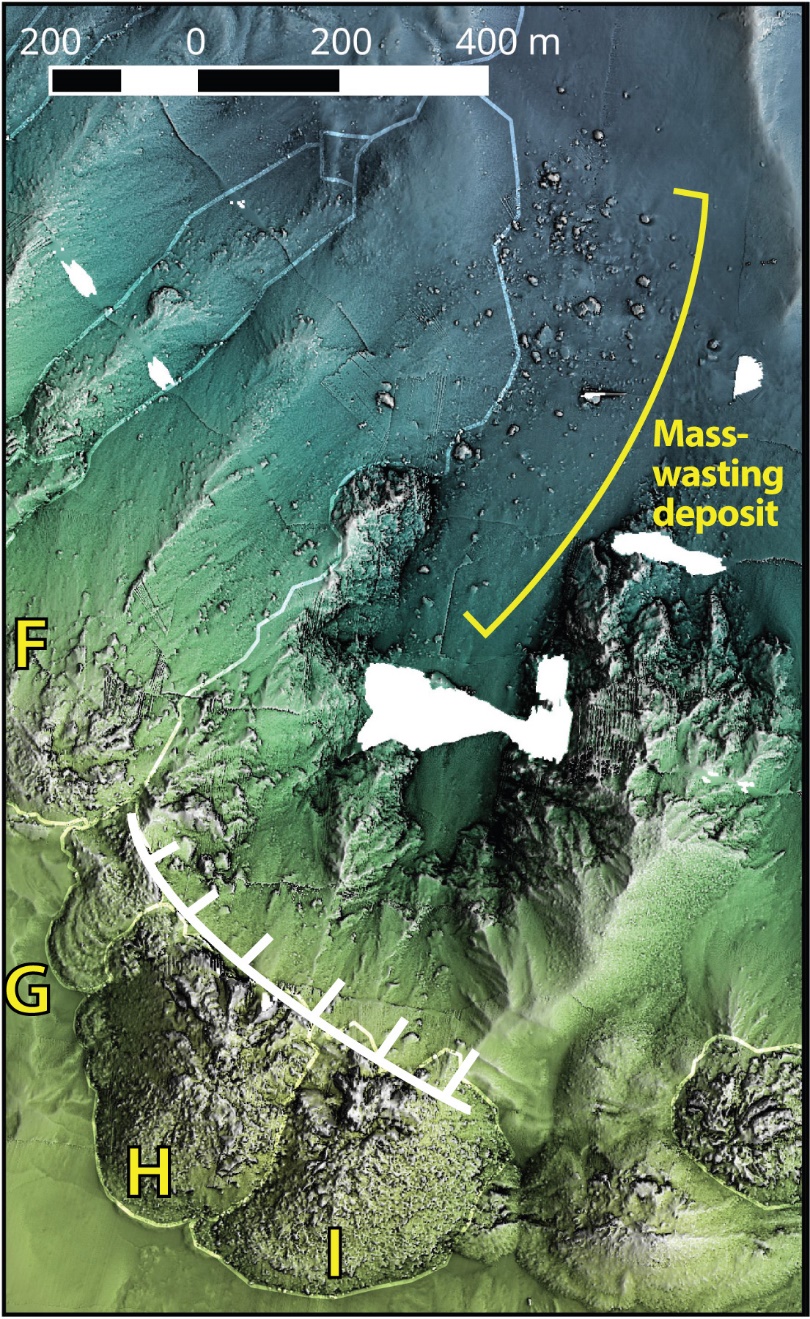
**

**Figure S11.** Map of the southwestern rim of Havre caldera, highlighting the mass-wasting scarp formed by partial collapse of domes G, H and I. Although the timing of emplacement of G, H and I with respect to the Giant Pumice deposit is not known, the collapse of these domes post-dates the eruption of the Giant Pumice deposit because giant pumice clasts on the caldera floor are partly buried by the mass-wasting deposit.White patches are places where bathymetric data capture was incomplete.


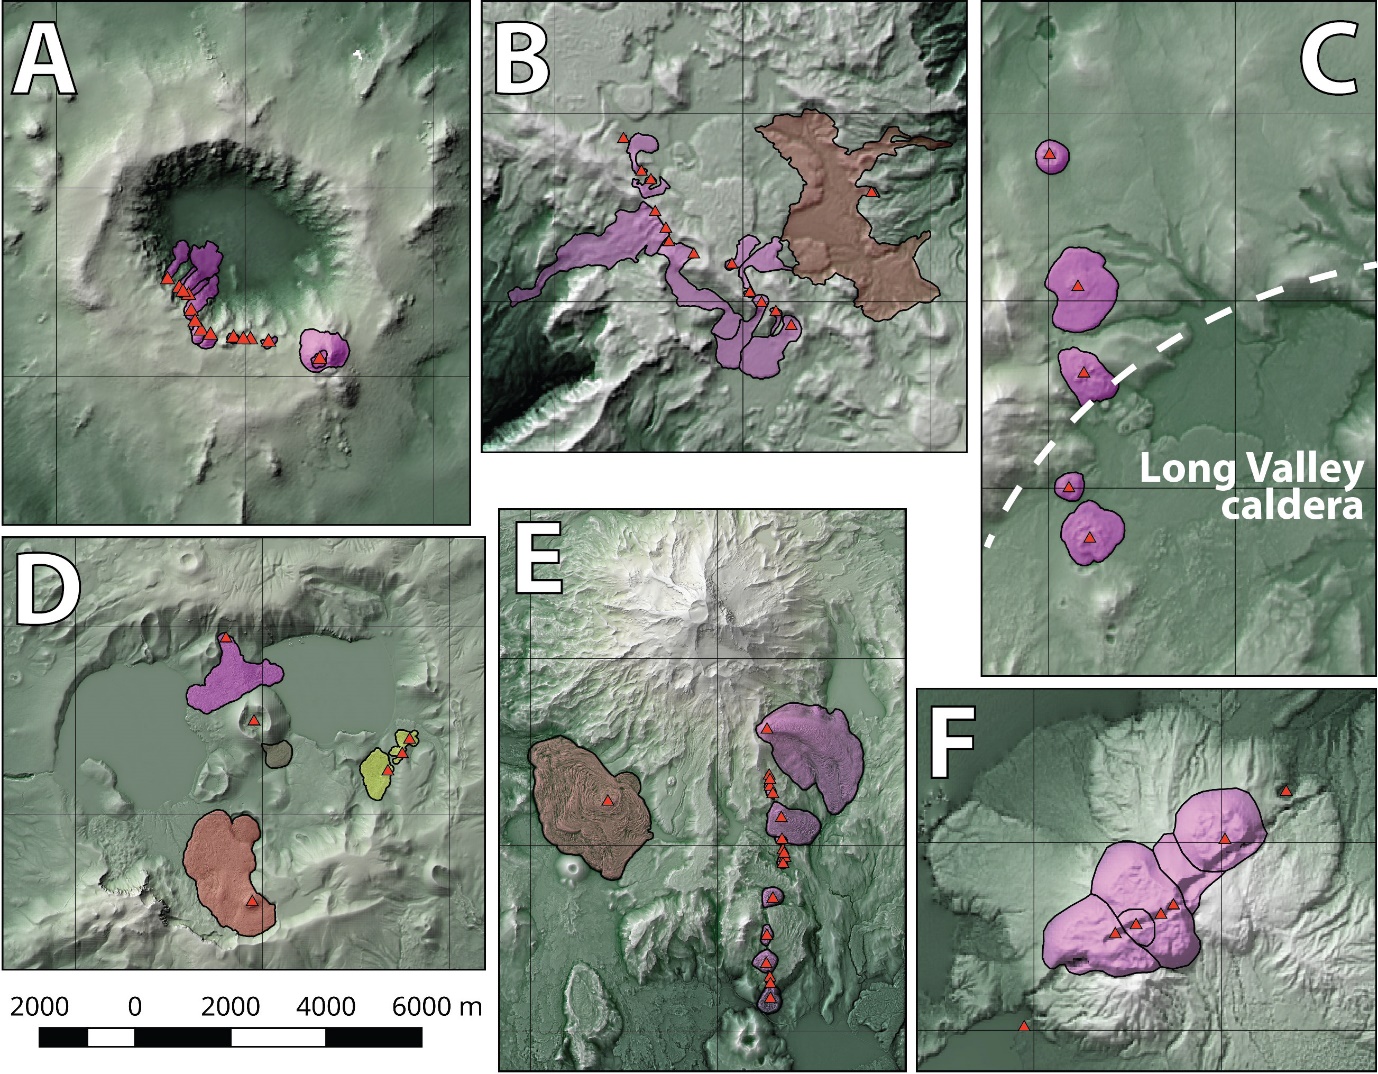


**Figure S12.** Comparison of the distribution of Holocene silicic lavas which were erupted from vents potentially controlled by geological structures. The red triangles represent morphologically inferred vents. All maps have been drawn at the same scale and same colour gradation relative to the height. A. Havre 2012 submarine lavas discussed in this study. B. Rhyodacite lava of Cordon-Caulle, Chile, erupted in 1960 (purple; after Lara et al., 2004) and obsidian lava erupted in 2011 (maroon; after Tuffen et al., 2013). C. Obsidian lava domes of Inyo volcanic chain, USA; the dome alignment crosses the rim of Long Valley caldera; after Miller (1985). D. Interlake Flow (purple), Game Hut Flow (gray), East Lake Flow (green) and Big Obsidian Flow (maroon) at Newberry volcano, USA; after MacLeod et al. (1995). E. Rhyolitic lavas of Rock Mesa (brown) and Devils Chain (purple) at South Sister, USA; after Scott (1987). F. Kaharoa rhyolite lava domes erupted during AD 1305 in Okataina volcanic complex, New Zealand; after Leonard et al. (2002).
